# Supplementary material for: A citizen science-based survey of avian mortality focusing on haemosporidian infections in wild passerine birds
Source: Malar J. 2021 Oct 23;20:417. doi: 10.1186/s12936-021-03949-y (PMC8542282; doi:10.1186/s12936-021-03949-y)
Supplement: Supplementary file 1 — Additional file 1. Case details for all bird carcasses confirmed positive for haemosporidian parasites by PCR and sequencing. [file 12936_2021_3949_MOESM1_ESM.xlsx]

## Sheet: Supplementary information
Additional file 1. Case details for all bird carcasses confirmed positive for haemosporidian parasites by PCR and sequencing.
Case ID	Host species	Age1	Sex	Collection date	Location (municipality)	Federal state	Location typology	Body mass (g)	Suscpected cause of death	Macroscopic findings	Trichomonadida PCR screening2	Haemosporidian parasites detected by PCR	Cytblineages & Genbank accessions
AH2011	Parus major	juvenile	female	2020-06-22	2345 Brunn am Gebirge	Lower Austria	rural	13.5	unknown	hepatomegaly	not performed	P. elongatum, Leucocytozoon sp.	GRW06 (MZ465328), PARUS4 (MZ465327)
AH2017	Carduelis carduelis	adult	female	2020-06-28	2221 Groß-Schweinbarth	Lower Austria	rural	12.5	trauma, trichomonosis	caseous yellowish masses on esophageal mucosa	positive	P. vaughani	SYAT05 (MZ465329)
AH2018	Cyanistes caeruleus	juvenile	female	2020-06-28	4400 Garsten	Upper Austria	rural	not recorded	trauma	intracranial bleeding	not performed	Leucocytozoon spp.	PARUS4 (MZ465330), CYACAE07 (MZ465331)
AH2019	Fringilla coelebs	adult	female	2020-07-03	3011 Tullnerbach	Lower Austria	rural	15	trichomonosis	caseous yellowish masses on esophageal/crop mucosa; cutaneous crusty (pox-like) lesions on left 2.,3. and 4. digits	positive	Haemoproteus sp.	CCF23 (MZ465332)
AH2022	Parus major	juvenile	unknown	2020-07-22	1210 Vienna	Vienna	urban	17	unknown	(decomposed)	not performed	P. elongatum	GRW06 (MZ465333)
AH2023	Pyrrhula pyrrhula	juvenile	male	2020-07-24	6371 Aurach bei Kitzbühel	Tirol	rural	18	trichomonosis	dilated esophagus/crop congested with feed	positive	Haemoproteus cf. majoris, Leucocytozoonspp.	EMSPO03 (MZ465334), PARUS25 (MZ465335), BT2 (MZ465336)
AH2024	Coccothraustes coccothraustes	juvenile	female	2020-07-30	3552 Droß	Lower Austria	rural	53	trauma	clotted blood in beak cavity and cranial thoracoadominal body cavity, lung contusion, splenomegaly, intracranial haemorrhages	not performed	Haemoproteus sp., Leucocytozoon spp.	HAWF6 (MZ465337), HAWF7 (MZ465338), COCCOC01 (MZ465339)
AH2025	Coccothraustes coccothraustes	juvenile	female	2020-07-30	3552 Droß	Lower Austria	rural	47	trichomonosis	gape/esophagus congested with feed	negative	Leucocytozoon spp.	HAWF7 (MZ465342), COCCOC01 (MZ465343), COCCOC02 (MZ465344)
AH2032	Parus major	adult	female	2020-08-13	1220 Vienna	Vienna	urban	12	unknown	anemic membranes, intestinal melena	not performed	P. relictum, P. elongatum	SGS1 (MZ465345), GRW06 (MZ465346)
AH2033	Cyanistes caeruleus	adult	unknown	2020-08-12	1220 Vienna	Vienna	urban	12	unknown	bloody content in intestines	not performed	Leucocytozoon sp.	PARUS4 (MZ465347)
AH2034	Coccothraustes coccothraustes	adult	male	2020-08-13	2392 Grub	Lower Austria	rural	39	trichomonosis	mucosal thickening of esophageal wall, bloody intestinal content	positive	Leucocytozoon sp.	HAWF7 (MZ465348)
AH2035	Fringilla coelebs	juvenile	female	2020-08-16	3011 Untertullnerbach	Lower Austria	rural	13.5	trichomonosis	mucosal thickening of esophageal wall	positive	Haemoproteus sp.	CCF23 (MZ465350)
AH2036	Fringilla coelebs	juvenile	female	2020-08-16	3040 Neulengbach	Lower Austria	rural	18	trichomonosis	oesphagus congested with feed; caseous yellowish masses on esophageal/crop mucosa; intracranial bleeding	positive	Haemoproteus sp.	CCF23 (MZ465351)
AH2037	Fringilla coelebs	juvenile	male	2020-08-17	7202 Bad Sauerbrunn	Burgenland	rural	17	trichomonosis	caseous yellowish masses on esophageal mucosa; intracranial bleeding; hepatomegaly	positive	Haemoproteus sp.	CCF23 (MZ465352)
AH2038	Fringilla coelebs	juvenile	male	2020-08-21	2392 Grub	Lower Austria	rural	16	trauma, trichomonosis	yellowish masses on pharyngeal mucosa, brain contusion	positive	Haemoproteus sp.	BRAM3 (MZ465353)
AH2039	Parus major	juvenile	unknown	2020-08-27	7511 Großbachselten	Burgenland	rural	not recorded	avian malaria	caseous masses on pharyngeal/esophageal mucosa; bloody content in intestine	not performed	P. relictum,P. elongatum	SGS1 (MZ465355), GRW06 (MZ465354)
AH2043	Cyanistes caeruleus	adult	unknown	2020-08-27	1220 Vienna	Vienna	urban	not recorded	unkown	pale liver, intracranial bleeding; intestinal melena	not performed	P. elongatum	GRW06 (MZ465356)
AH2049	Fringilla coelebs	adult	male	2020-09-03	5071 Walserberg	Salzburg	rural	not recorded	trichomonosis	rough esopageal/crop mucosa; melena in gizzard	not performed	Haemoproteus sp., Leucocytozoon sp.	CCF23 (MZ465357), BRAM3 (MZ465358)
AH2050	Fringilla coelebs	adult	female	2020-09-07	3144 Phyra	Lower Austria	rural	17	trichomonosis	caseous yellowish masses on esophageal/crop mucosa	not performed	Haemoproteus sp.	CCF23 (MZ465359)
AH2137	Fringilla coelebs	adult	male	2020-09-16	2801 Katzlsdorf	Lower Austria	rural	18	trichomonosis	intracranial bleeding; beak cavity congested with feed, yellowish mass on esophageal muscosa, intestinal melena	positive	Haemoproteus sp.	CCF23 (MZ465360)
AH2138	Chloris chloris	adult	female	2020-09-22	1020 Vienna	Vienna	urban	18	trichomonosis	intracranial bleeding, beak cavity congested with feed, hyperemic esophageal mucosa with greyish-brown discolorations, intestinal melena	positive	Haemoproteus sp.	CARCHL01 (MZ465361)
AH2140	Turdus merula	adult	male	2020-09-22	4501 Neuhofen/Krems	Upper Austria	rural	67	Usutu virus infection	hepato-/splenomegaly	not performed	P. vaughani	SYAT05 (MZ465362)
AH2141	Fringilla coelebs	adult	male	2020-09-26	1130 Vienna	Vienna	urban	not recorded	trichomonosis	dilatation of esophagus/crop, yellowish-brownish masses on esophageal mucosa, intracranial bleeding	positive	P. relictum	GRW11 (MZ465363)
AH2147	Botaurus stellaris	juvenile	female	2020-10-18	1230 Vienna	Vienna	urban	not recorded	trauma	clotted blood in beak cavity and thoracoadominal body cavity, lung contusion and hemorrhages, spleno-/hepatomegaly	not performed	Leucocytozoon sp.	BOTSTEL01 (MZ465364)
AH2149	Turdus merula	adult	female	2020-10-19	2490 Ebenfurth	Lower Austria	rural	not recorded	trauma	exophthalmos left eye, intracranial bleeding, splenomegaly	not performed	P. vaughani	SYAT05 (MZ465365)
1 juvenile = 1. (hatching) year, adult = 2. year and older
